# Supplementary material
Source: Springer Nature journal article supplement (https://www.springermedizin.de/resource/supplementary/12990_2008_164_MOESM1_ESM.pdf/9612702)
Supplement: MOESM1 [file 9612702]

**Additional Table 1.**

| <b>Target name</b>                                | <b>Species</b> | <b>Tissues</b>  | <b>Concentration</b> | <b>% inhibition</b> | <b>Assay</b>        |
|---------------------------------------------------|----------------|-----------------|----------------------|---------------------|---------------------|
| Cyclooxygenase COX-2                              | Human          | recombinant     | 10 $\mu$ M           | -16                 | Enzymatic           |
| Fatty Acid Amide Hydrolase (FAAH)                 | Rat            | brain           | 10 $\mu$ M           | -5                  | Enzymatic           |
| Nitric Oxide Synthase, Neuronal (nNOS)            | Rat            | cerebellum      | 10 $\mu$ M           | 23                  | Enzymatic           |
| Phospholipase PLA2-II                             | Crotalus atrox |                 | 10 $\mu$ M           | -4                  | Enzymatic           |
| Protein Serine/Threonine Kinase, MAPK1 (ERK2)     | Human          | recombinant     | 10 $\mu$ M           | 5                   | Enzymatic           |
| Protein Serine/Threonine Kinase, IKK-2            | Human          | recombinant     | 10 $\mu$ M           | 23                  | Enzymatic           |
| Protein Serine/Threonine Kinase, MAPK11 (p38beta) | Human          | recombinant     | 10 $\mu$ M           | 1                   | Enzymatic           |
| Adenosine A1                                      | Human          | recombinant     | 10 $\mu$ M           | -1                  | Radioligand Binding |
| Adrenergic alpha1, Non-Selective                  | Rat            | brain           | 10 $\mu$ M           | 2                   | Radioligand Binding |
| Adrenergic alpha2, Non-Selective                  | Rat            | cerebral cortex | 10 $\mu$ M           | 12                  | Radioligand Binding |
| Bradykinin B1                                     | Human          | IMR-90 cells    | 10 $\mu$ M           | 4                   | Radioligand Binding |
| Bradykinin B2                                     | Human          | recombinant     | 10 $\mu$ M           | 7                   | Radioligand Binding |
| Calcitonin Gene-Related Peptide CGRP1             | Human          | SK-N-MC cells   | 10 $\mu$ M           | -10                 | Radioligand Binding |

|                                         |        |                          |            |     |                     |
|-----------------------------------------|--------|--------------------------|------------|-----|---------------------|
| Calcium Channel L-Type, Dihydropyridine | Rat    | cerebral cortex          | 10 $\mu$ M | 1   | Radioligand Binding |
| Calcium Channel N-Type                  | Rat    | brain frontal lobe       | 10 $\mu$ M | 2   | Radioligand Binding |
| Cannabinoid CB1                         | Human  | recombinant              | 10 $\mu$ M | 0   | Radioligand Binding |
| Cannabinoid CB2                         | Human  | recombinant              | 10 $\mu$ M | 33  | Radioligand Binding |
| Chemokine CCR1                          | Human  | recombinant              | 10 $\mu$ M | 7   | Radioligand Binding |
| Chemokine CCR2B                         | Human  | recombinant              | 10 $\mu$ M | -8  | Radioligand Binding |
| Chemokine CCR5                          | Human  | recombinant              | 10 $\mu$ M | 11  | Radioligand Binding |
| Cholecystokinin CCK2 (CCKB)             | Human  | FGS-7 Jurkat cells       | 10 $\mu$ M | -2  | Radioligand Binding |
| Dopamine D1                             | Human  | recombinant              | 10 $\mu$ M | -2  | Radioligand Binding |
| Dopamine D2L                            | Human  | recombinant              | 10 $\mu$ M | 5   | Radioligand Binding |
| GABAA, Muscimol, Central                | Rat    | brain (minus cerebellum) | 10 $\mu$ M | -1  | Radioligand Binding |
| GABAB, Non-Selective                    | Rat    | brain                    | 10 $\mu$ M | 3   | Radioligand Binding |
| Gabapentin                              | Rat    | brain cortex             | 10 $\mu$ M | -1  | Radioligand Binding |
| Glutamate, Non-Selective                | Rat    | brain                    | 10 $\mu$ M | 7   | Radioligand Binding |
| Glycine, Strychnine-Sensitive           | Rat    | spinal cord              | 10 $\mu$ M | 25  | Radioligand Binding |
| Interleukin IL-1                        | Mouse  | 3T3 cells                | 10 $\mu$ M | 6   | Radioligand Binding |
| Interleukin IL-6                        | Human  | U266 cells               | 10 $\mu$ M | 1   | Radioligand Binding |
| Transporter, Monoamine                  | Rabbit | platelets                | 10 $\mu$ M | 37  | Radioligand Binding |
| Muscarinic, Non-Selective, Central      | Rat    | cerebral cortex          | 10 $\mu$ M | 2   | Radioligand Binding |
| Tachykinin NK3                          | Human  | recombinant              | 10 $\mu$ M | -2  | Radioligand Binding |
| Nicotinic Acetylcholine                 | Human  | IMR-32 cells             | 10 $\mu$ M | -6  | Radioligand Binding |
| Opiate, Non-Selective                   | Rat    | brain                    | 10 $\mu$ M | 21  | Radioligand Binding |
| Orphanin ORL1                           | Human  | recombinant              | 10 $\mu$ M | -10 | Radioligand Binding |
| Prostanoid EP2                          | Human  | recombinant              | 10 $\mu$ M | -4  | Radioligand Binding |

|                                                         |            |                               |            |     |                     |
|---------------------------------------------------------|------------|-------------------------------|------------|-----|---------------------|
| Prostanoid EP4                                          | Human      | recombinant                   | 10 $\mu$ M | 4   | Radioligand Binding |
| Purinergic P2X                                          | Rabbit     | urinary bladder               | 10 $\mu$ M | 7   | Radioligand Binding |
| Purinergic P2Y                                          | Rat        | brain                         | 10 $\mu$ M | 6   | Radioligand Binding |
| Serotonin (5-Hydroxytryptamine)<br>5-HT1, Non-Selective | Rat        | cerebral cortex               | 10 $\mu$ M | -1  | Radioligand Binding |
| Serotonin (5-Hydroxytryptamine)<br>5-HT2, Non-Selective | Rat        | brain                         | 10 $\mu$ M | -1  | Radioligand Binding |
| Serotonin (5-Hydroxytryptamine)<br>5-HT3                | Human      | recombinant                   | 10 $\mu$ M | -12 | Radioligand Binding |
| Sigma, Non-Selective                                    | Guinea pig | brain                         | 10 $\mu$ M | 37  | Radioligand Binding |
| Sodium Channel, Site 2                                  | Rat        | brain                         | 10 $\mu$ M | 40  | Radioligand Binding |
| Tumor Necrosis Factor (TNF),<br>Non-Selective           | Human      | U937 cells                    | 10 $\mu$ M | -8  | Radioligand Binding |
| Vanilloid                                               | Rat        | spinal cord                   | 10 $\mu$ M | -2  | Radioligand Binding |
| Vasoactive Intestinal Peptide<br>VIP1                   | Human      | HT29 colon<br>carcinoma cells | 10 $\mu$ M | 4   | Radioligand Binding |
